# Supplementary material for: Proteomic Insight into the Response of Arabidopsis Chloroplasts to Darkness
Source: PLoS One. 2016 May 3;11(5):e0154235. doi: 10.1371/journal.pone.0154235 (PMC4854468; doi:10.1371/journal.pone.0154235)
Supplement: S4 Table — (XLSX) [file pone.0154235.s005.xlsx]

## Sheet: Sheet1
S4 Table . Darkness-decreased proteins in chloroplasts identified in this study.
Protein Accession	Protein Description	Subcellular localization	Protein Mass	Protein Coverage	D2/D1 Ratio	D2/D1 P value	D3/D1 Ratio	D3/D1 P value	D3/D2 Ratio	D3/D2 P value	L/D Ratio	D/L Ratio	L/D P value	L1/D1 Ratio	D1/L1 Ratio	L1/D1 P value	L2/D2 Ratio	D2/L2 Ratio	L2/D2 P value	L2/L1 Ratio	L2/L1 P value	L3/D3 Ratio	D3/L3 Ratio	L3/D3 P value	L3/L1 Ratio	L3/L1 P value	L3/L2 Ratio	L3/L2 P value
Q9SJE1	Magnesium-chelatase subunit ChlD, chloroplastic	chloroplast	93084	13.6	0.993	0.93638	0.925	0.08892	0.988	0.36386	1.381	0.724113	2.435e-06	1.358	0.736377	4.445e-05	1.33	0.75188	5.4358e-06	1.02	0.8945	1.463	0.683527	6.817e-06	1.007	0.90902	1.018	0.466
Q39061	chloroplast RNA-binding protein 33	chloroplast	38643	13.1	1.062	0.100614	1.046	0.17354	0.982	0.80128	1.485	0.673401	0.0030318	1.564	0.639386	0.00095362	1.43	0.699301	0.0067892	0.978	0.49264	1.491	0.670691	0.0172712	0.953	0.24892	0.965	0.37928
Q94EH5	31-kDa RNA binding protein	chloroplast	38038	30.1	0.974	0.41018	1.027	0.0130776	1.043	0.032086	1.929	0.518403	3.249e-12	1.88	0.531915	0	1.96	0.510204	3.249e-12	1.013	0.91522	1.873	0.533903	3.2488e-12	1.012	0.6647	1.006	0.39556
Q8VYM4	Putative uncharacterized protein At3g52150	chloroplast	32315	27.7	0.976	0.72634	0.951	0.80654	1.02	0.92942	1.859	0.537924	7.4046e-07	1.716	0.582751	0.00074832	1.848	0.541126	1.94192e-05	1.024	0.54388	1.785	0.560224	6.097e-06	1.014	0.98036	0.994	0.27572
A1A6M1	plastid transcriptionally active 5	chloroplast	49604	17.8	1.018	0.104744	1.09	0.075126	1.062	0.178422	1.388	0.720461	0.0022718	1.472	0.679348	4.5014e-05	1.385	0.722022	3.4936e-05	1	0.99208	1.374	0.727802	5.582e-05	1.021	0.83996	1.037	0.89698
Q9SHI1	Translation initiation factor IF-2, chloroplastic	chloroplast	130302	16.2	0.983	0.77536	1.031	0.6842	1.005	0.72288	1.542	0.648508	9.376e-08	1.487	0.672495	9.3106e-07	1.559	0.641437	1.80136e-07	1.02	0.049656	1.606	0.622665	2.301e-08	1.008	0.4213	0.978	0.195396
Q93VC7	Putative ribosomal protein S1	chloroplast	50810	23.8	0.978	0.12958	0.958	0.41438	0.975	0.80342	1.681	0.594884	1.01084e-08	1.647	0.607165	1.47964e-08	1.681	0.594884	4.888e-08	1.026	0.55486	1.729	0.578369	9.299e-09	1.001	0.98764	0.973	0.67594
P56798	30S ribosomal protein S3, chloroplastic	chloroplast	30156	35.8	1.006	0.74182	0.971	0.29358	0.981	0.3732	1.389	0.719942	0.00037662	1.361	0.734754	7.1548e-06	1.385	0.722022	9.4858e-06	0.993	0.96512	1.408	0.710227	0.00062342	1.031	0.5707	0.997	0.92186
P93014	30S ribosomal protein S5, chloroplastic	chloroplast	37953	37.3	0.983	0.2337	0.973	0.8716	1.025	0.50042	2.89	0.346021	1.42104e-08	2.869	0.348554	1.31268e-07	2.853	0.350508	2.7512e-08	0.968	0.43738	2.894	0.345543	1.02802e-08	0.991	0.71454	1.01	0.42352
Q9ASV6	30S ribosomal protein S20, chloroplastic	chloroplast	27598	16.3	1.03	0.16716	1.085	0.30244	1.053	0.42244	2.254	0.443656	0.00199632	2.357	0.424268	0.00096622	2.329	0.429369	0.00115528	0.993	0.6903	2.116	0.47259	0.0089812	0.992	0.2466	0.947	0.054492
Q9LY66	50S ribosomal protein L1, chloroplastic	chloroplast	45342	25.7	0.986	0.52264	0.901	0.0039734	0.918	0.0029122	1.998	0.500501	3.7484e-06	1.874	0.533618	1.49302e-06	1.902	0.525762	1.21648e-07	1.023	0.43604	2.15	0.465116	2.8618e-08	1.05	0.53954	1.02	0.88278
P56791	50S ribosomal protein L2, chloroplastic	chloroplast	35402	23.7	1.007	0.70596	0.935	0.91358	0.993	0.94494	1.41	0.70922	0.00151922	1.498	0.667557	0.0019135	1.407	0.710732	0.0025436	1.055	0.84738	1.397	0.71582	0.00065724	1.018	0.97554	1.008	0.93644
Q0WW46	ribosomal protein L4	chloroplast	35811	23	1.027	0.7246	0.927	0.9479	0.955	0.9167	2.331	0.429	0.0074408	2.15	0.465116	0.0109908	2.357	0.424268	0.00133848	1.017	0.68934	2.405	0.4158	0.000982	0.99	0.77634	0.971	0.6427
O04603	50S ribosomal protein L5, chloroplastic	chloroplast	34169	32.4	0.955	0.72936	0.98	0.85454	0.953	0.79614	3.026	0.330469	9.9768e-05	2.459	0.406669	0.000127446	2.896	0.345304	0.00021534	0.992	0.77174	3.074	0.325309	7.6196e-05	1.046	0.139282	1.036	0.2256
P25864	50S ribosomal protein L9, chloroplastic	chloroplast	27906	9.1	1.036	0.29268	1.016	0.52132	0.981	0.43342	2.254	0.443656	0.0020334	2.212	0.45208	0.0054726	2.319	0.43122	0.00089788	1.074	0.0953	2.142	0.466853	0.0031842	1.033	0.7013	0.918	0.087354
B5X0P0	Ribosomal protein L10 family protein	chloroplast	29703	17.3	0.955	0.140608	0.951	0.36484	1.041	0.96546	1.951	0.512558	0.0100312	1.844	0.542299	0.029766	1.849	0.540833	0.0098396	1.03	0.4438	1.947	0.513611	0.0037932	1.054	0.072712	1.052	0.142286
P36210	50S ribosomal protein L12-1, chloroplastic	chloroplast	23271	54.5	0.976	0.69354	0.928	0.43484	0.997	0.55686	1.76	0.568182	4.308e-07	1.867	0.535619	8.0192e-07	1.857	0.538503	8.8154e-07	0.997	0.25396	1.761	0.567859	5.1544e-06	1.01	0.68436	0.951	0.67348
P56792	50S ribosomal protein L14, chloroplastic	chloroplast	15062	45.1	1.013	0.23814	0.993	0.25094	0.926	0.058216	1.546	0.646831	3.4314e-05	1.437	0.695894	0.0001393	1.539	0.649773	0.0002529	0.992	0.84446	1.496	0.668449	6.1228e-05	0.982	0.6354	0.985	0.92978
P25873	50S ribosomal protein L15, chloroplastic	chloroplast	35818	23.1	0.963	0.69186	0.988	0.5409	0.957	0.5804	1.879	0.532198	0.009208	1.762	0.567537	0.0161774	1.922	0.520291	0.008106	0.993	0.48464	1.972	0.507099	0.00145964	1.054	0.2728	1.059	0.07748
P51412	50S ribosomal protein L21, chloroplastic	chloroplast	27861	6.4	0.98	0.3465	0.843	0.21072	0.957	0.63366	3.235	0.309119	0.00119602	2.836	0.352609	0.006343	3.104	0.322165	0.00077176	0.971	0.6747	3.546	0.282008	0.0016124	1.012	0.70234	1.038	0.107472
P92959	50S ribosomal protein L24, chloroplastic	chloroplast	28264	17.7	1.042	0.72568	0.941	0.87238	1.103	0.29486	3.861	0.259	0.000287	3.528	0.283447	0.00084636	3.877	0.257931	0.00012291	1.038	0.28336	4.025	0.248447	0.00042868	1.072	0.25556	1.04	0.8729
Q9FWS4	50S ribosomal protein L31, chloroplastic	chloroplast	20548	16	1.015	0.63146	0.976	0.29844	0.932	0.37654	2.31	0.4329	0.028456	2.165	0.461894	0.0261	2.172	0.460405	0.042862	1.017	0.103164	2.562	0.39032	0.02302	1.066	0.094334	1.051	0.151418
B9DH43	Ribosomal L29 family protein	chloroplast	23949	16.8	1	0.54112	1.024	0.49928	1.007	0.70412	4.242	0.235738	0.0003749	3.77	0.265252	0.0023392	4.151	0.240906	0.00022264	1.012	0.42262	4.712	0.212224	0.00029826	1.071	0.103554	1.036	0.181424
Q93VK7	Heavy metal transport/detoxification superfamily protein	chloroplast	20892	36.5	1.049	0.22648	1.066	0.137874	1.042	0.2368	1.862	0.537057	0.00094236	2.108	0.474383	0.0003987	1.872	0.534188	5.1208e-05	0.983	0.1616	1.806	0.55371	0.00069544	0.942	0.14301	1.023	0.35714
F4KG18	Triose phosphate/phosphate translocator TPT	chloroplast	50879	3.4	0.904	0.033128	1.1	0.0823	1.219	0.021744	1.695	0.589971	0.03338	1.611	0.620732	0.032766	1.834	0.545256	0.021366	1.011	0.057716	1.605	0.623053	0.048232	1.073	0.186346	1.056	0.21838
Q0WMN5	Uncharacterized protein At3g49140	chloroplast	62080	4.6	0.983	0.56866	1.048	0.20516	1.118	0.176838	1.423	0.702741	0.00078552	1.578	0.633714	0.00159724	1.472	0.679348	0.000105202	0.938	0.86414	1.384	0.722543	0.021532	0.946	0.71428	1	0.7831
The proteins were listed including their protein accessions, protein name, subcellular localization given by Uniprot_Arabidopsis database, protein mass and protein coverage, protein ratios and p-values given by the ProteinPilot software are presented.The abbreviations are as follows: D1, D2, D3, each is representative of the quantitative result of three replicates for dark-treated samples. L1, L2…
